# Supplementary material
Source: publisher figshare collection journal article supplement (https://tandf.figshare.com/ndownloader/files/21518805)

Table S1Primers for qRT-PCR analysis

|  | | |
| --- | --- | --- |
| **Gene** | **Primer Sequence （5'-3'）** | |
| **Forward** | **Reverse** |
| 7JZ58T | CTGGTTTCATCGGTTCATGG | CCTTCTTCATATTTGCTGGGT |
| P831EU | CAACTCCCAATTACGTCCCT | GTGAATGGCGACTTGATCTC |
| DJQ4R3 | AATCTGCTTCCTCTGTTTCC | GTGGTTCTGATGTTGGTAGTG |
| NBHN08 | CCAATAATCAACTACCTTTCCC | CATTCCAATCACAACTTCAACC |
| NV8XP7 | CTGATGATGCTAACACTGTC | GCAATATACGCTTTACCTCTC |
| RBR1AL | CTTACCGCTCTTAACATTCCT | AATCTTGTGCTCTACTCCAG |
| B6E5H4 | CCACTTCTTTCAACACTAGG | CTTTCTTAATCTCTTGGCTCC |
| 1WY37S | GAACTCTTCAAACTCTTTCTCC | GAACTTTCTTGATCTCTTGGCT |
| QPL1HC | TATTCTTCACACTCCATACTCC | AACGCCTAACTCCATAACAG |
| DZ16HD | ATTCATCAAGAGTTTCCGCA | GATTATCACCTTCCCTTCTTTCC |
| PGZW4I | TTCCAACTCTTCACGAAACC | GGTAAATGCTACTCTCACGA |
| J3K16K | ATGACCTTCTAAGAGCTTGTG | GAGATCAACTTCATCTTCAGAG |
| ADTW6E | TGGAAGATGACCTTCTAAGAG | CTCTCCTCGCTTTATATTTGGT |
| 1LQ424 | ATAGGGTTCCTCTATTGGCTG | AACAATCATCTCCACTTCTTCC |
| 4RT82Q | CAAGAACGCAGCATAGAACAG | GACTCTGTTCCTGTCTCCTC |
| Actin | GTCATCGTCATCCTCTTCTC | CATTCCTGTTCCATTGTCAC |

**Fig. S1** Random reads distribution of ZH8 and ZH9. **A** Random reads distribution of ZH8-1. **B** Random reads distribution of ZH8-2. **C** Random reads distribution of ZH8-3. **D** Random reads distribution of ZH9-1. **E** Random reads distribution of ZH9-2. **F** Random reads distribution of ZH9-3.


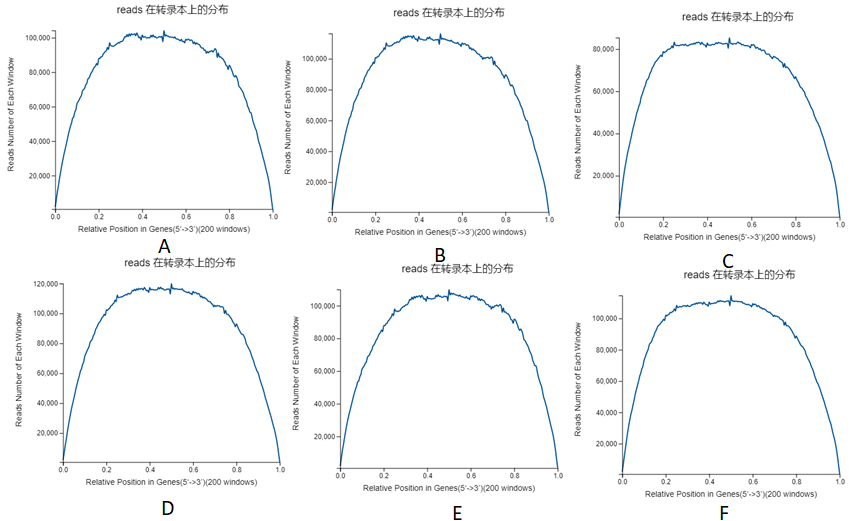


**Fig. S2** Reads coverage of ZH8 and ZH9. **A** Reads coverage of ZH8-1. **B** Reads coverage of ZH8-2. **C** Reads coverage of ZH8-3. **D** Reads coverage of ZH9-1. **E** Reads coverage of ZH9-2.

**F** Reads coverage of ZH9-3.


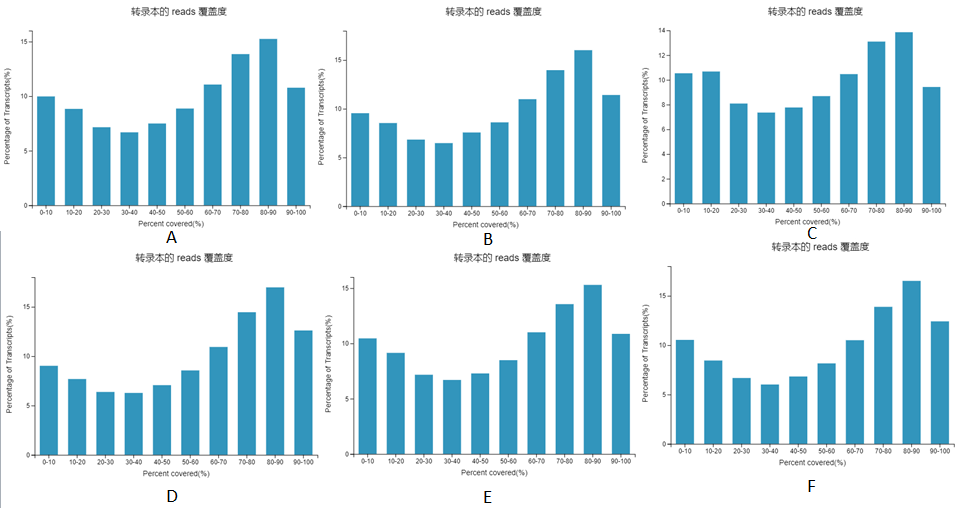


**Fig. S3** Up-regulated statistics and Down-regulated statistics of KEGG Enrichment. **A** Up-regulated statistics of KEGG pathway. **B** down-regulated statistics of KEGG pathway


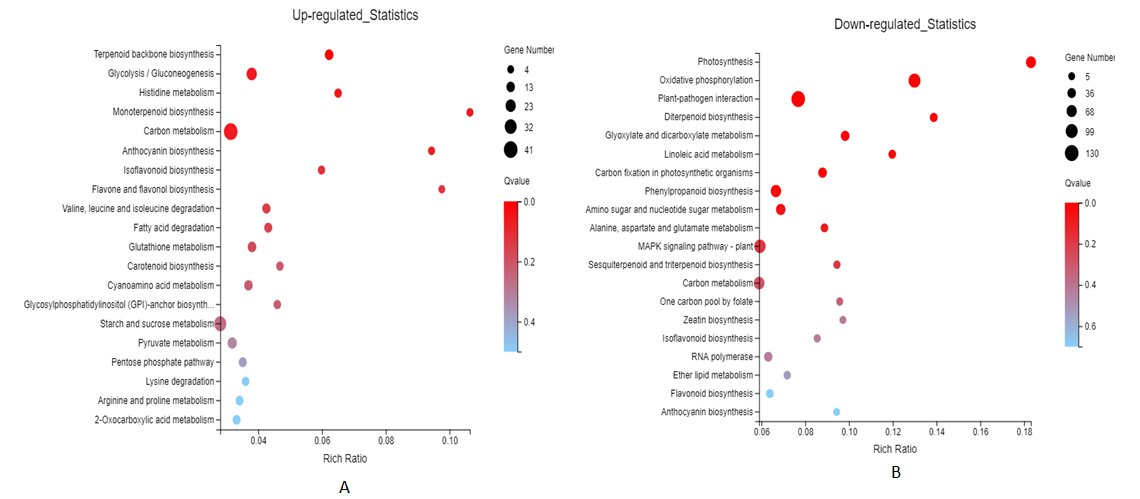

Supplement: Supplementary file 1 [file 21518805]
